# Supplementary material for: Polyamine biosynthesis is critical for growth and differentiation of the pancreas
Source: PubMed Central journal article supplement (PMC4547391; doi:10.1038/srep13269), 2015-08-24
Supplement: srep13269-s1.pdf [file srep13269-s1.pdf]

## SUPPLEMENTARY FIGURES AND LEGENDS

### 'Polyamine biosynthesis is critical for growth and differentiation of the pancreas'

Teresa L. Mastracci, Morgan A. Robertson, Raghavendra G. Mirmira and Ryan M. Anderson

#### Supplementary Fig. S1. Protein alignment of Odc1.

Comparison of human, mouse and zebrafish Odc1 protein sequence.

```
human_ODC1  MNNFGNEEFDCFLDEGFTAKDILDQKINEVSSSDDKDAFYVADLGDILKKHLRWLKALP
mouse_Odc1  MSSFTKDEFDCFLDEGFTAKDILDQKINEVSSSDDKDAFYVADLGDILKKHLRWLKALP
zfish_Odc1  MTACTGSDFDFAFLEEGFCARDIVEQKINESSLSDDKDAFYVADLGDVLLKKHLRWLRVLP
* .      .: **   :*: **  *: ** : :***** * *****:*****: .**

human_ODC1  RVTPFYAVKCNSDKAIVKTLAATGTGFDCAKTEIQLVQSLGVPPIIYANPCKQVSQI
mouse_Odc1  RVTPFYAVKCNSRAIVSTLAAIGTGFDCAKTEIQLVQGLGVAERVIYANPCKQVSQI
zfish_Odc1  RITPFYAVKCNSRAVVTTLASLGAGFDCAKTEIQIVQSVGVDPRIIYANPCKQVSQI
*:*****:*:*.***: *:*****:*.:** .*:*****

human_ODC1  KYAANNGVQMMTFDSEVELMKVARAHPKAKLVLR IATDDSKAVCR LSVKFGATLR TSRL
mouse_Odc1  KYAASNGVQMMTFDSEIELMKVARAHPKAKLVLR IATDDSKAVCR LSVKFGATLKT SRL
zfish_Odc1  KYASAHGVQMMTFDSEVELMKVARSHENAKLVLR IATDDSKAVCR LSVKFGATLKS SRL
***: :*****:*****:* :*****:*****:*****:*****

human_ODC1  LERAKELNIDVVGVSFHVSGCTDPETFVQAI SDARCVFDMGAEVGF SMYLLDIGGFPG
mouse_Odc1  LERAKELNIDVIGVSFHVSGCTDPETFVQAVS DARCVFDMATEVGF SMHLLDIGGFPG
zfish_Odc1  LERAKELGLDVIGVSFHVSGCTDPETYSQAI SDARYVFDIGAELGYNMSLLDIGGFPG
*****.:**:* *****: **:* ** * **:.:*.** *****

human_ODC1  SEDVCLKFEEITGVINPALDKYFPSDSGVRI IAE PGRYYVASAFTLAVNI IAKKIVLKEQ
mouse_Odc1  SEDTKLKFEEITSVINPALDKYFPSDSGVRI IAE PGRYYVASAFTLAVNI IAKKTVWKEQ
zfish_Odc1  SEDTKLKFEEIAAVINPALDKYFPVDSGVRI IAE PGRYYVASAYTLAVNI IAKKVMKEQ
***.*****: .***** *****:*****:***** : ***

human_ODC1  TGSDDDE-DESSEQTFMYVNDGVYGSFNCILYDHAHV KPLLQKRPKPDEKYYSSSIWGPT
mouse_Odc1  PGSDDDE-DESNEQTFMYVNDGVYGSFNCILYDHAHV KALLQKRPKPDEKYYSSSIWGPT
zfish_Odc1  SASDEEEDVSNDR TLMYYVNDGVYGSFNCILYDHAHV LPTLHKKPKPDERMYPCSIWGPT
..**:* * *.:*:***** . *:*****: *..*****

human_ODC1  CDGLDRIVERCDLPEMHVGDWMLFENMGAYTVA AASTFNGFQRPTIYYVMSGPAWQLMQQ
mouse_Odc1  CDGLDRIVERCNLPEMHVGDWMLFENMGAYTVA AASTFNGFQRPNIIYYVMSRPMWQLMKQ
zfish_Odc1  CDGLDRIVEQC SLPDMQVGDWLLFENMGAYTVA AASTFNGFQKPDIIYYIMSRTAWQCMQQ
*****:*.**:*:*****:*****:*****:*****:* **:* ** . ** *:*

human_ODC1  FQNPDFPP-EVEEQDASTLPVSCAWESGMKRHRAACASAS INV
mouse_Odc1  IQSHGFPP-EVEEQDDGTLPMSCAQESGMDRHPAACASAR INV
zfish_Odc1  IRAQGIPALPLEEPSAGNVPSHCGRESSLDVPAKPCPTQVL--
:: .:*. :** . .:* * . **:. .*.: :
```

## Supplementary Fig. S2. Titration of DFMO in zebrafish.

(a) Percentage of viable embryos in control (n = 180), 1% w/v DFMO-treated (n = 33), 2% w/v DFMO-treated (n = 45), 3% w/v DFMO-treated (n = 28), 5% w/v DFMO-treated (n = 24), and 10% w/v DFMO-treated (n = 15) embryos at 72 hpf. (b) Percentage of control (n = 32), 1% w/v DFMO-treated (n = 33), 2% w/v DFMO-treated (n = 40) embryos at 72 hpf with altered body axis due to DFMO treatment. (c) Representative images of control and DFMO-treated *Tg(ptf1a:gfp)* embryos displaying the phenotype of altered (truncated) body axis. (d) The *ptf1a*:GFP-expressing retina (r) and hindbrain (hb) were unaltered in DFMO-treated *Tg(ptf1a:gfp)* embryos compared with controls, at 48 hpf and 72 hpf.

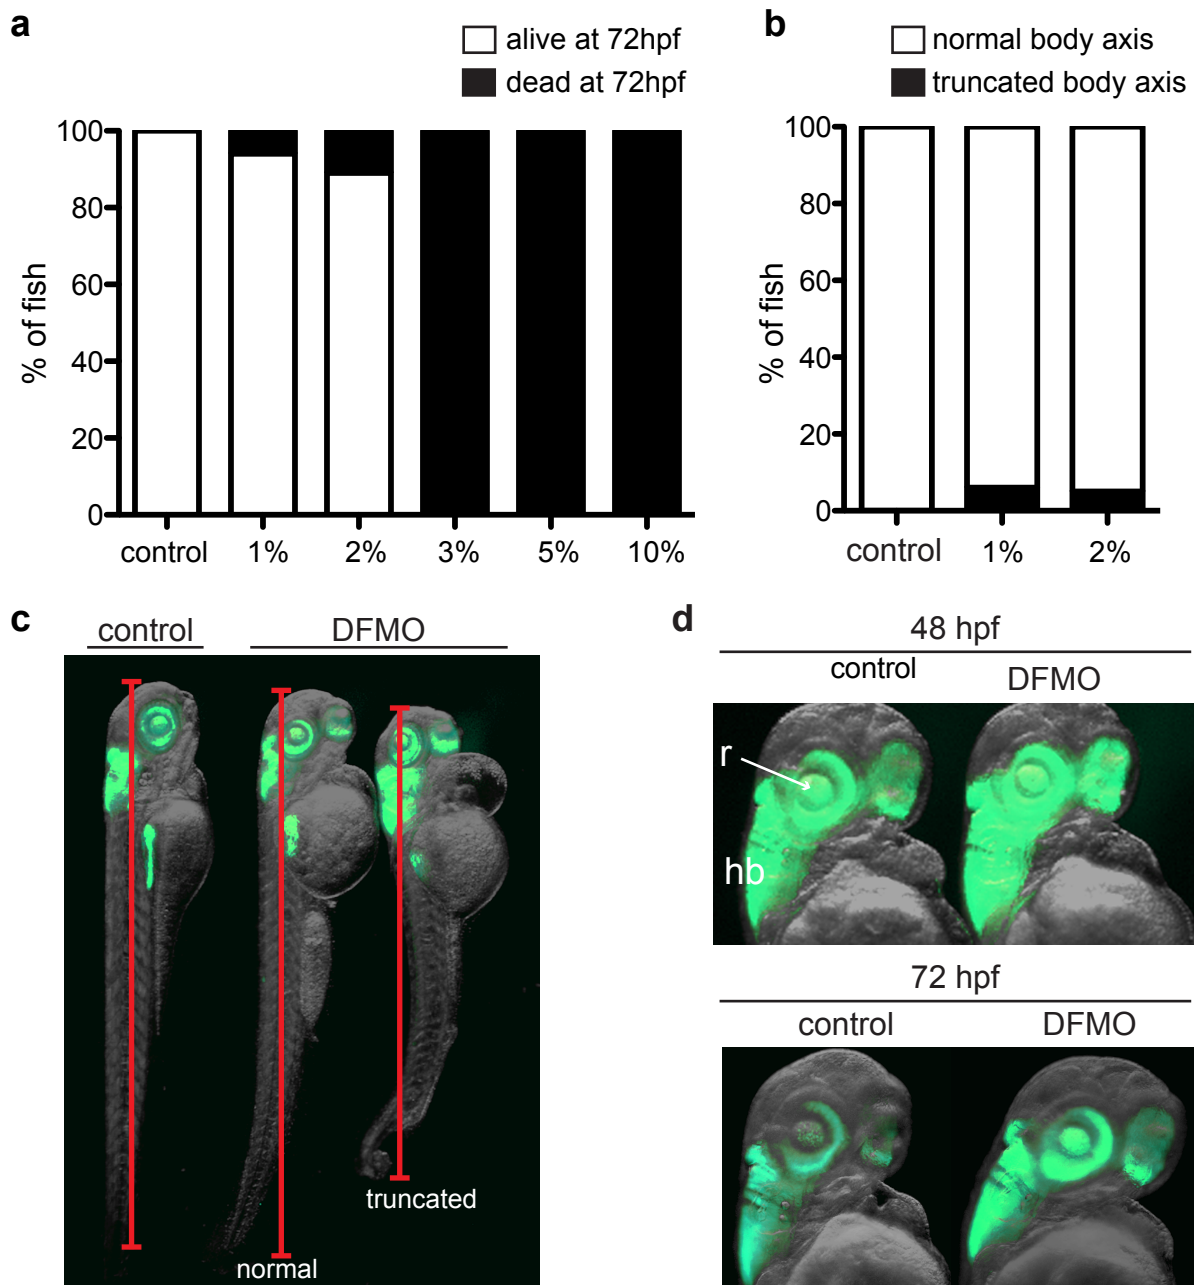



**Supplementary Fig. S3. Endocrine cell phenotype following inhibition of polyamine biosynthesis by DFMO treatment.**

Representative images at 72 hps of glucagon-expressing cells in (a) control and (b) DFMO-treated *Tg(ptf1a:gfp)* embryos; insulin-expressing cells in (c) control and (d) DFMO-treated *Tg(ptf1a:gfp)* embryos; and insulin/glucagon co-expressing cells in (e) control and (f) DFMO-treated *Tg(ptf1a:gfp)* embryos. (g) Glucose measurement from control or DFMO-treated embryos at 72 hpf (n = 3 groups of 10 embryos/group) ( $p = 0.4821$ ). (h) Western blot analysis for expression of DHS, eIF5A<sup>Hyp</sup>, and Erk1/2 in control and DFMO-treated embryos at 72 hpf (n = 4 groups of 30 embryos/group); Erk1/2 was used as a loading control, as expression of this protein is not altered with DFMO treatment. Quantification showed no change in (i) DHS expression ( $p = 0.2370$ ) but a significant decrease in (j) eIF5A<sup>Hyp</sup> expression ( $p = 0.0039$ ). gluc, glucagon; ins, insulin. \*  $p < 0.05$ , \*\*  $p < 0.01$ , \*\*\*  $p < 0.001$ ; ns, not significant.

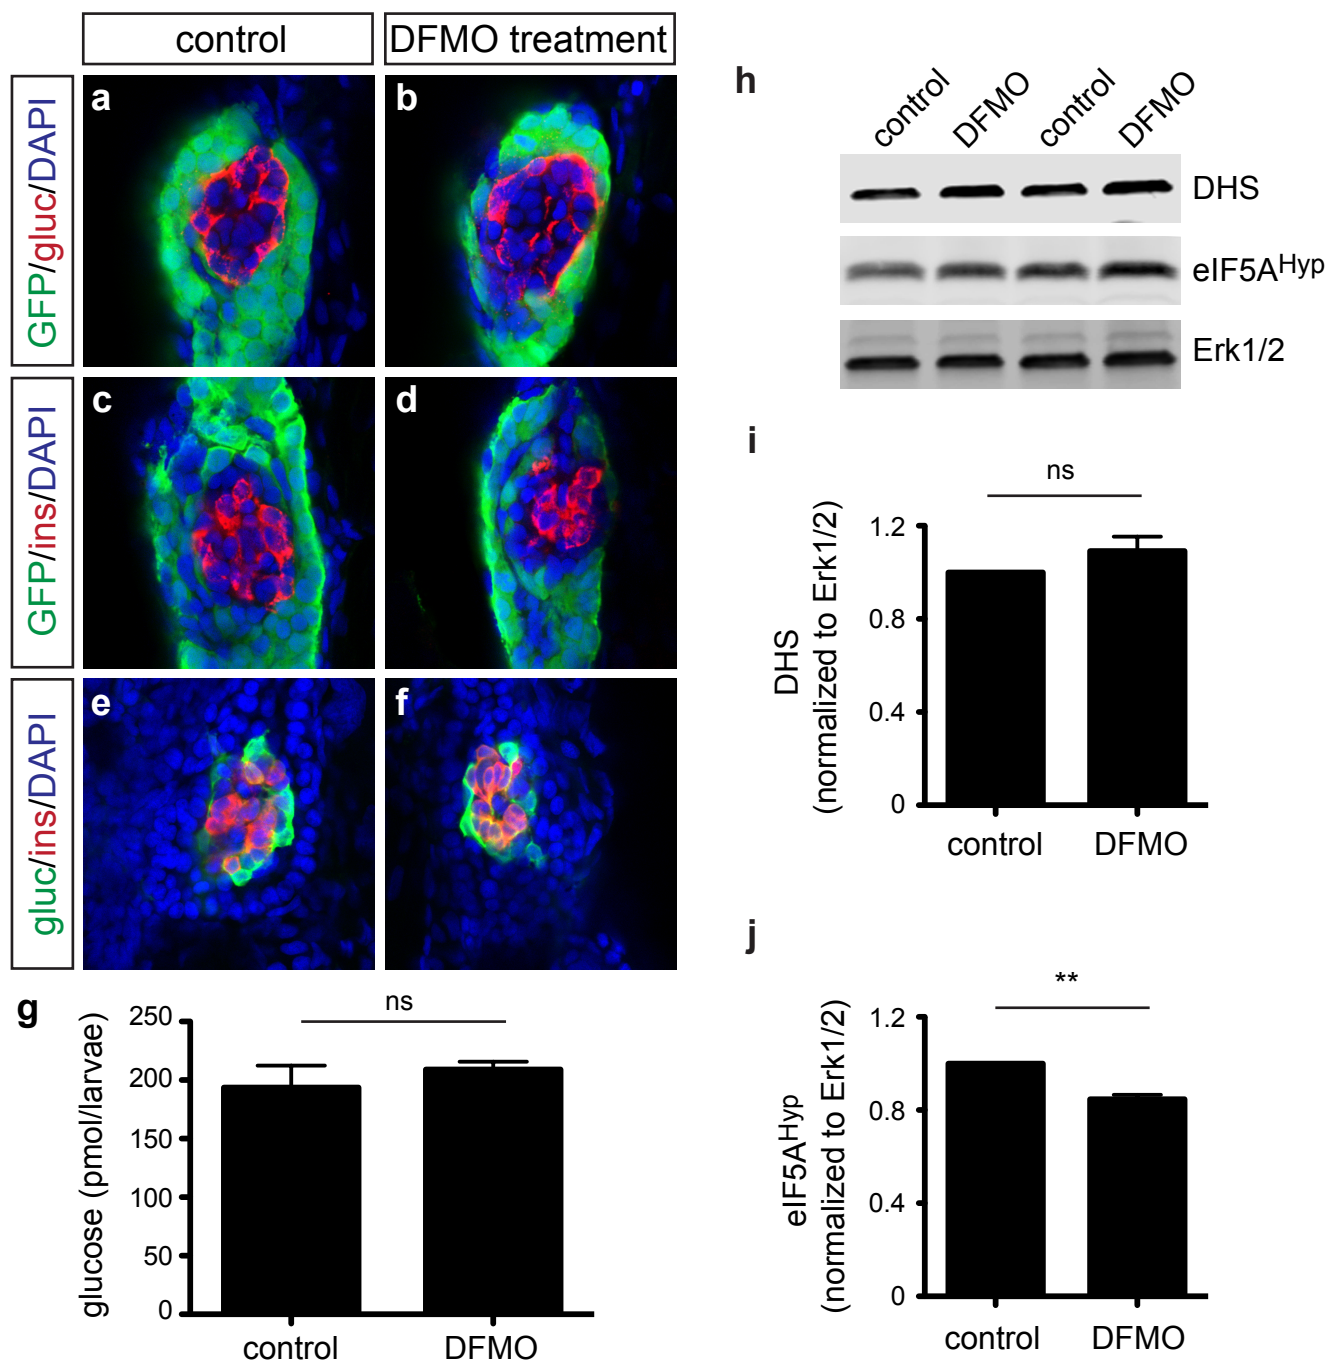



**Supplementary Fig. S5. Expression patterns of *eif5a* in zebrafish at 48 hpf.**

At 48 hpf, (a) *eif5a* has strong expression in the exocrine compartment compared with the (b) *neurod1*:GFP+ endocrine cell compartment; (c) shows the merged image. (d) Image showing the pancreas (dotted box) and adjacent neural tube. (e) The corresponding maximum intensity projection of *eif5a* expression in the pancreas at 48 hpf; dotted box denotes pancreas domain.

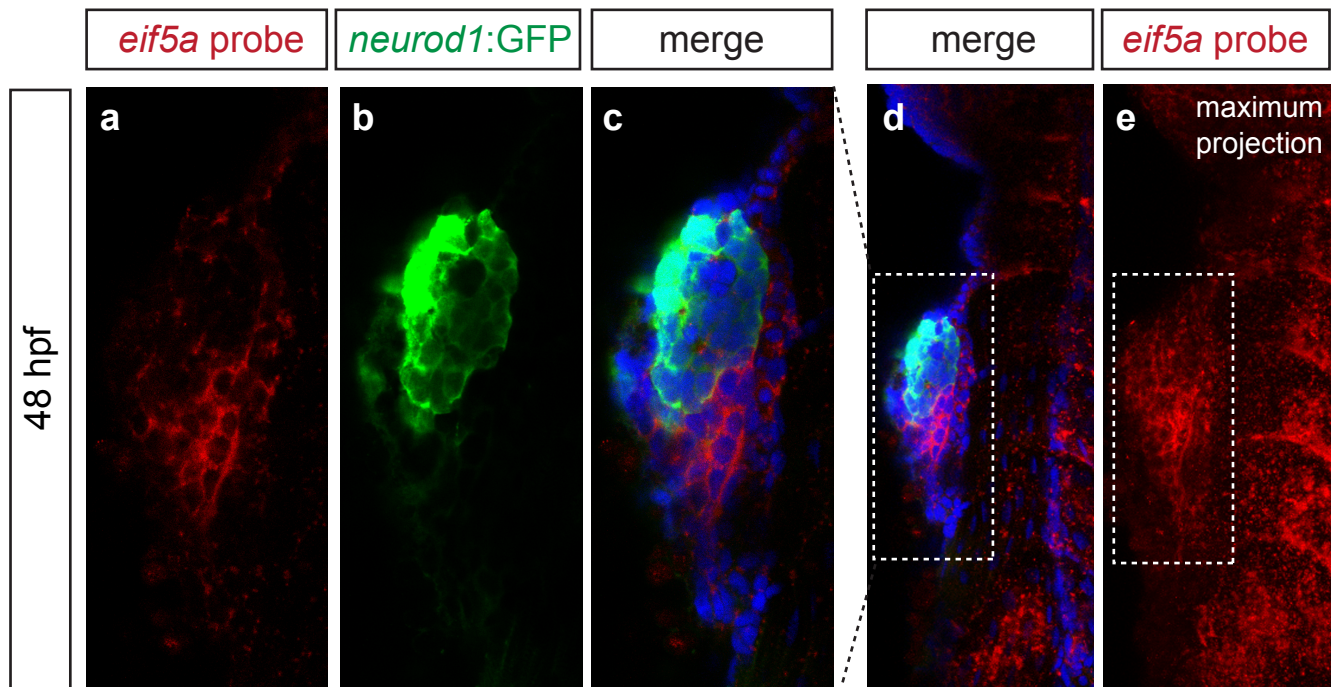

**Supplementary Fig. S6. Phenotypic penetrance and expressivity in *dhps* MO-injected embryos.**

(a) Control, 1 ng MO-injected, and 2 ng MO-injected *Tg(ptf1a:gf)* embryos displaying the phenotype of normal or altered (truncated) body axis. White dotted box demarks pancreas.  
 (b) Percentage of control (n = 20), 1 ng MO-injected (n = 46), and 2 ng MO-injected (n = 23) embryos with altered body axis following implementation of the *dhps* MO.  
 (c) Sequencing data showing the deletion of exon 2 as a result of *dhps* MO knockdown. Primers used for PCR amplification are highlighted in green; the deleted region is indicated by dashed lines.

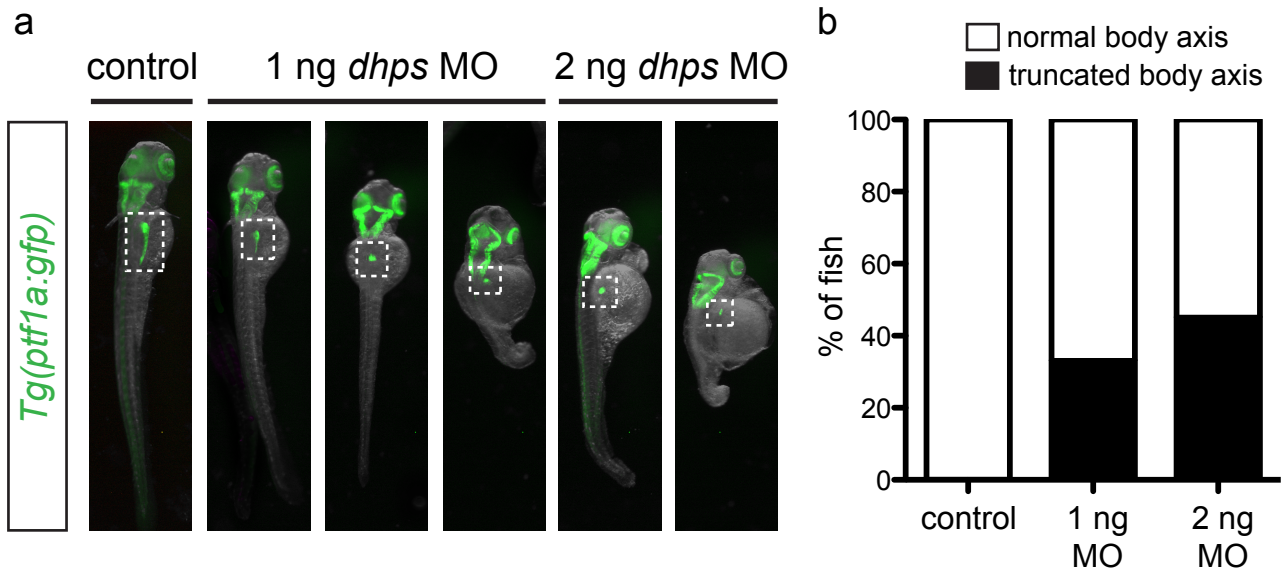

**c**

```

zf dhps cDNA GCGCTGTGAAATGTGAGTGAACCAACGAGAACTACACCTAAAAAGCCGG
zf dhps MO  GCGCTGTGAAATGTGAGTGAACCAACGAGAACTACACCTAAAAAGCCGG
*****

zf dhps cDNA ATTTACATCCATAACCCCGTGC GGATCGGTGAGCTCCTCATGGCGGGTCA
zf dhps MO  ATTTACATCCATAACCCCGTG-----
*****

zf dhps cDNA GGCTCCGCCGGTGGCCCGGCCGCGGTGCTGAAGGAGAGCACGCCTCTGCC
zf dhps MO  -----

zf dhps cDNA GGACAATCTGCCTCAGATCAGAGGATACGACTTTAACCAGGGCCTGAACCA
zf dhps MO  -----

zf dhps cDNA CAGAGCGCTGCTGCAGTCCTTCATCACTACCGGCTTCCAGGCCTCCAGCTT
zf dhps MO  -----

zf dhps cDNA CGGCCTGGCAGTGCAGGAGATCAATAAGATGATAGAGAAGAGGCTGGAGCC
zf dhps MO  -----ATAGAGAAGAGGCTGGAGCC
*****

zf dhps cDNA GGTGCAGGAGGAGTGTGAGGACAGTGATTCTCGTCAGTCTGCTTTGGGATG
zf dhps MO  GGTGCAGGAGGAGTGTGAGGACAGTGATTCTCGTCAGTCTGCTTCGGGATG
*****

zf dhps cDNA CACTATATTCCTGGGCTACACGTCAAAC
zf dhps MO  CACTATATTCCTGGGCTACACGTCAAAC
*****
    
```
